## 1 **Repurposing CD19-directed immunotherapies for pediatric t(8;21) acute myeloid leukemia**

2 Farnaz Barneh<sup>1#</sup>, Joost B. Koedijk<sup>1,2#</sup>, Noa E. Wijnen<sup>1,3#</sup>, Tom Meulendijks<sup>1</sup>, Mino Ashtiani<sup>1</sup>, Ester  
3 Dunnebach<sup>1,4</sup>, Noël Dautzenberg<sup>1</sup>, Annelisa M. Cornel<sup>1,4</sup>, Anja Krippner-Heidenreich<sup>1</sup>, Kim  
4 Klein<sup>1,5</sup>, C. Michel Zwaan<sup>1,2</sup>, Jürgen Kuball<sup>4</sup>, Stefan Nierkens<sup>1,4</sup>, Jacqueline Cloos<sup>6</sup>, Gertjan J.L.  
5 Kaspers<sup>1,3\*</sup>, Olaf Heidenreich<sup>1,7,8\*</sup>

6 #Shared first-authorship; \*Shared senior-authorship

7 1. Princess Máxima Center for Pediatric Oncology, Utrecht, The Netherlands

8 2. Erasmus MC-Sophia Children's Hospital, Department of Pediatric Oncology, Rotterdam, The  
9 Netherlands

10 3. Emma Children's Hospital, Amsterdam UMC, Vrije Universiteit, Department of Pediatric Oncology,  
11 Amsterdam, The Netherlands

12 4. Center for Translational Immunology, University Medical Center Utrecht, Utrecht University, Utrecht,  
13 The Netherlands

14 5. Wilhelmina Children's Hospital/University Medical Center, Utrecht, The Netherlands

15 6. Department of Hematology, Amsterdam UMC, Vrije Universiteit Amsterdam, Cancer Center  
16 Amsterdam, The Netherlands

17 7. Wolfson Childhood Cancer Research Centre, Translational and Clinical Research Institute, Newcastle  
18 University, Newcastle upon Tyne, United Kingdom

19 8. University Medical Center Utrecht, Utrecht University, Utrecht, The Netherlands

20

### 21 **Corresponding authors:**

22 G.J.L. Kaspers, Princess Máxima Center for Pediatric Oncology, Heidelberglaan 25, 3584 CS  
23 Utrecht, The Netherlands. E-mail: [g.j.l.kaspers@prinsesmaximacentrum.nl](mailto:g.j.l.kaspers@prinsesmaximacentrum.nl); Tel: +31889727272

24 O. Heidenreich, Princess Máxima Center for Pediatric Oncology, Heidelberglaan 25, 3584 CS  
25 Utrecht, The Netherlands. E-mail: [O.T.Heidenreich@prinsesmaximacentrum.nl](mailto:O.T.Heidenreich@prinsesmaximacentrum.nl); Tel:  
26 +31683069960

27 **Short title:** Targeting CD19 in t(8;21) AML

28 **Disclosure of interest:** The authors declare no conflicts of interest.

29 **Funding:** This work has been funded by a KIKA (329) program grant to O.H.

30 **Word count:** 4307 (main text), 232 (abstract). **Figures:** 6 main figures, 4 supplementary  
31 figures. **Tables:** 1 main table, 3 supplementary tables. **Supplementary Methods:** 1 file.

32 **Abstract**

33 In contrast to patients with B cell precursor acute lymphoblastic leukemia (BCP-ALL), patients  
34 with acute myeloid leukemia (AML) have not yet benefited from recent advances in targeted  
35 immunotherapy. Repurposing immunotherapies that have been successfully used to target other  
36 hematological malignancies could, in case of a shared target antigen, represent a promising  
37 opportunity to expand the immunotherapeutic options for AML. Here, we evaluated the expression  
38 of CD19 in a large pediatric AML cohort, assessed the *ex vivo* AML killing efficacy of CD19-  
39 directed immunotherapies, and characterized the bone marrow immune microenvironment in  
40 pediatric AML, BCP-ALL, and non-leukemic controls. Out of 167 newly diagnosed *de novo*  
41 pediatric AML patients, 18 patients (11%) had CD19<sup>+</sup> AML, with 61% carrying the translocation  
42 t(8;21)(q22;q22). Among CD19<sup>+</sup> samples, we observed a continuum of CD19 expression levels  
43 on AML cells. In individuals exhibiting unimodal and high CD19 expression, the antigen was  
44 consistently present on nearly all CD34<sup>+</sup>CD38<sup>-</sup> and CD34<sup>+</sup>CD38<sup>+</sup> subpopulations. In *ex vivo* AML-  
45 T cell co-cultures, blinatumomab demonstrated substantial AML killing, with an efficacy similar to  
46 BCP-ALL. In addition, CAR T cells could effectively eliminate CD19<sup>+</sup> AML cells *ex vivo*.  
47 Furthermore, our immunogenomic assessment of the bone marrow immune microenvironment of  
48 newly diagnosed pediatric t(8;21) AML revealed that T- and NK cells had a less exhausted and  
49 senescent phenotype in comparison to pediatric BCP-ALL. Altogether, our study underscores the  
50 promise of CD19-directed immunotherapies for the treatment of pediatric CD19<sup>+</sup> AML.

51

52 **Keywords:** children, tumor immune microenvironment, blinatumomab, CAR T cells, tumor  
53 antigens

## 54 **Introduction**

55 Although the survival of children with acute myeloid leukemia (AML) has improved considerably  
56 over the past decades, 25-35% of patients face relapse, which still has an unfavorable  
57 prognosis.<sup>1-3</sup> In addition, current high-dose chemotherapy and allogeneic stem cell transplantation  
58 (allo-SCT) regimens lead to significant side and late effects, together illustrating the need for more  
59 effective and less toxic therapeutic options.<sup>3</sup> Nontransplant, targeted immunotherapies such as  
60 bispecific antibodies and CAR T cells are of interest given their successes in both solid and  
61 hematological malignancies.<sup>4-6</sup> However, the development of targeted immunotherapy for AML  
62 has been challenging, mainly due to the paucity of tumor-specific antigens, on-target off-leukemia  
63 hematotoxicity when targeting myeloid-lineage antigens, and the immunosuppressive tumor  
64 microenvironment.<sup>7, 8</sup> Accordingly, with the exception of the CD33-directed antibody-drug-  
65 conjugate gemtuzumab ozogamicin, no targeted immunotherapeutic agents have been approved  
66 for adults or children with AML.<sup>9, 10</sup> Hence, repurposing immunotherapies that have been  
67 successfully used to target other hematological malignancies could, in case of a shared target  
68 antigen, represent a promising opportunity to expand the immunotherapeutic options for AML.

69 CD19 is a B cell marker which is highly expressed on B cell precursor acute lymphoblastic  
70 leukemia (BCP-ALL) cells. For children and adults with BCP-ALL, the CD19-directed bispecific T  
71 cell-engager blinatumomab (CD3 x CD19) and CD19-directed chimeric antigen receptor (CAR) T  
72 cells (tisagenlecleucel) demonstrated promising results in both pediatric and adult BCP-ALL,  
73 which ultimately led to their clinical approval.<sup>6, 11-15</sup> In AML, expression of CD19 is characteristic  
74 for t(8;21)(q22;q22), the most common translocation in children with this disease.<sup>16</sup> Interestingly,  
75 two case studies have reported complete molecular responses in two adults with relapsed CD19<sup>+</sup>  
76 t(8;21) AML following treatment with either blinatumomab or CD19-directed CAR T cells.<sup>17, 18</sup>  
77 Furthermore, two clinical trials are currently investigating the efficacy of CD19-directed CAR T

78 cells in relapsed and refractory (R/R) adult AML (NCT04257175 and NCT03896854). In several  
79 pediatric hematological malignancies including AML, another clinical trial is testing a combination  
80 of T cell-directed immunotherapies including blinatumomab in R/R CD19<sup>+</sup> patients after allo-SCT  
81 (NCT02790515). Apart from these case studies and ongoing trials, CD19-directed  
82 immunotherapies have not yet been studied in pediatric or adult AML and therefore, its efficacy  
83 in AML remains unknown.

84 Here, we examined the expression of CD19 on AML cells in a large cohort of children with  
85 newly diagnosed *de novo* AML, evaluated the *ex vivo* efficacy of CD19-directed immunotherapies,  
86 and characterized the bone marrow (BM) immune microenvironment in pediatric AML, BCP-ALL,  
87 and non-leukemic controls. Our work reveals pediatric t(8;21) AML as a subgroup with a high  
88 percentage of CD19<sup>+</sup> patients, and CD19<sup>+</sup> t(8;21) AML to be sensitive to blinatumomab- and CAR  
89 T cell-mediated cytotoxicity. Furthermore, our immunogenomic analyses of the BM immune  
90 microenvironment show that T- and NK cells in pediatric t(8;21) AML have a less exhausted and  
91 senescent phenotype in comparison to pediatric BCP-ALL. Altogether, our study demonstrates  
92 the potential of CD19-directed immunotherapies for the treatment of pediatric CD19<sup>+</sup> t(8;21) AML.

## 93 **Materials and Methods**

### 94 **Ethical regulations**

95 This study complied with all relevant ethical regulations and was approved by the Institutional  
96 Review Board of the Princess Máxima Center (PMCLAB2021.207, PMCLAB2021.258, and  
97 PMCLAB2022.334).

### 98 **Clinical and flow cytometry data**

99 A retrospective medical records analysis identified pediatric patients with newly diagnosed *de*  
100 *novo* AML treated in Dutch hospitals between January 2012 and October 2022 (details on

101 treatment regimen and response definitions are provided in Supplementary Methods). Reports of  
102 flow cytometry data collected in the diagnostic and, if applicable, relapse setting were retrieved to  
103 screen patients for CD19 positivity according to the guideline for assessment of marker positivity  
104 by the Dutch Foundation for Quality Assessment in Medical Laboratories (SKML; Supplementary  
105 Methods).<sup>19</sup>

### 106 **CD19 expression analysis**

107 The flow cytometry standard files, which were accessible for seven t(8;21) AML patients in the  
108 total study cohort, were utilized to examine the CD19 expression on myeloid blasts. Flow  
109 cytometry results were analyzed using FlowJo™ (v10.10 Software; BD Life Sciences) or Kaluza  
110 Analysis software (v2.2.1.20183; Beckman Coulter). The gating strategy for defining AML blasts  
111 is shown in **Figure 3A**. The coverage of CD19 expression among AML subpopulations was further  
112 determined by analyzing BM mononuclear cells (MCs) from two t(8;21) AML patients and one  
113 t(8;21) AML patient-derived xenograft (PDX) sample (RL048)<sup>20</sup> by flow cytometry (Cytoflex LX,  
114 Beckman Coulter; antibodies provided in Supplementary Methods).

### 115 ***Ex vivo* T cell killing assays**

116 For allogeneic killing assays, healthy donor CD3<sup>+</sup> T cells isolated from healthy donors were first  
117 expanded using a previously published rapid expansion protocol.<sup>21</sup> Subsequently, T cells were  
118 co-cultured with CD19<sup>+</sup> primary t(8;21) AML BMMCs, RL048 PDX cells, or primary BCP-ALL  
119 BMMCs, at various effector-to-target (E:T) ratios (Supplementary Methods). Next, blinatumomab  
120 (1 nM; Blincyto®, Amgen) was added to the co-cultures for 48 hours, and co-cultures in the  
121 absence of blinatumomab were used to determine the extent of background killing. In autologous  
122 killing assays with primary BMMCs, blinatumomab (1 nM) was added directly to unsorted samples  
123 (1 x 10<sup>5</sup> BMMCs per well on a 96-well plate) to activate T cells present in the sample. The viability

124 of blinatumomab-treated samples was normalized to conditions without blinatumomab. Details on  
125 the T cell activation and Interferon- $\gamma$  secretion procedures are provided in Supplementary  
126 Methods.

### 127 **Bulk RNA-sequencing**

128 Bulk RNA-sequencing (RNA-seq) and data analysis was performed according to the institute's  
129 standard pipelines.<sup>22, 23</sup> Details on the comparison of gene expression profiles between CD19<sup>+</sup>-  
130 and CD19<sup>-</sup> t(8;21) AML are provided in Supplementary Methods. To characterize the BM immune  
131 microenvironment of patients with CD19<sup>+</sup>- and CD19<sup>-</sup> t(8;21) AML (n=10), AML with other  
132 genotypes (n=30; cytogenetic data and other clinical parameters are shown in **Supplementary**  
133 **Table 1**), BCP-ALL (n=209; cytogenetic data and other clinical parameters are depicted in  
134 **Supplementary Table 2**), and non-leukemic controls (n=4)<sup>26</sup>, we applied the immune  
135 deconvolution platform CIBERSORTx (cibersortx.stanford.edu; LM22 reference signature) to  
136 estimate the abundance of lymphoid populations and the TIDE algorithm to infer the abundance  
137 of several myeloid and stromal cell types (tide.dfci.harvard.edu; rationale for selected cell  
138 populations and details of other immune-based scores are provided in Supplementary  
139 Methods).<sup>27-30</sup>

### 140 **Statistical analyses**

141 All data were analyzed using the SPSS software (v26.0.0.1; IBM, USA) and GraphPad Prism  
142 (v8.0.2; GraphPad Software, USA). Two-sided *P* values of < 0.05 were considered statistically  
143 significant. Details of statistical methods and tests are provided in Supplementary Methods.

144

145 **Results**

146 **CD19 expression is enriched in pediatric t(8;21) AML**

147 To investigate CD19 as a potential target antigen in pediatric AML, we examined 167 *de novo*  
148 pediatric AML patients for CD19 positivity at diagnosis and, when applicable, at relapse. Using  
149 records of diagnostic flow cytometry data, we identified 18 newly diagnosed patients (11%) with  
150 CD19<sup>+</sup> AML cells (n=8 with CD19 median fluorescence intensity (MFI) difference ( $\Delta$ ) between  
151 leukemic blasts and healthy population of >10-fold, n=10 with  $\Delta$ MFI of 3 to 10-fold; **Figure 1A**).  
152 We next explored whether CD19 expression was associated with specific cytogenetic alterations.  
153 In line with data in adult AML, we found that 61% (n=11) of CD19<sup>+</sup> patients carried the  
154 translocation t(8;21)(q22;q22) (n=3: CD19  $\Delta$ MFI >10-fold, n=8: 3 to 10-fold; **Figure 1B**).<sup>33, 34</sup> Other  
155 cytogenetic alterations of CD19<sup>+</sup> pediatric AML patients included t(9;11)(p22;q23) (n=2),  
156 t(16;21)(q24;q22) (n=2), t(1;11)(q21;q23) (n=1), inv(16)(p13;q22) (n=1), and in one case  
157 cytogenetic information was not available (**Figure 1B**; additional clinical characteristics are listed  
158 in **Table 1**). In the entire cohort, 21 out of 167 patients had the (8;21) translocation, indicating that  
159 52% of patients with this translocation were CD19<sup>+</sup> (**Figure 1C**).

160 Regarding patient outcomes of CD19<sup>+</sup> AML patients, all (n=18) achieved complete  
161 remission (CR) by the end of the second induction course (100%), and there were no early deaths.  
162 Among the patients with CD19<sup>+</sup> AML at diagnosis, five experienced disease relapse (**Figure 1A**).  
163 In two of these cases, AML cells retained CD19 positivity, and both patients are currently alive.  
164 Conversely, in three cases, AML cells lost their CD19 expression at relapse. One of these patients  
165 deceased, which was the only death among patients with CD19<sup>+</sup> AML at diagnosis. Intriguingly,  
166 three patients with CD19<sup>-</sup> AML at diagnosis gained CD19 positivity at relapse (out of 33 relapses  
167 in the CD19<sup>-</sup> AML group), with a fatal outcome in one of these patients.

168           Next, we investigated whether CD19 expression on AML cells was associated with event-  
169 free survival (EFS) and overall survival (OS). To account for the confounding effect of cytogenetic  
170 alterations, we compared EFS and OS among all t(8;21) patients (n=21). In this exploratory  
171 analysis, the 5-year EFS and 5-year OS for the CD19<sup>+</sup> (n=11) and CD19<sup>-</sup> (n=10) groups were  
172 65% (SE 17) and 74% (SE 16), and 100% and 89% (SE 11), respectively, showing no substantial  
173 difference, although the cohort size was limited (**Figure S1A-B**). Taken together, our data reveal  
174 an enrichment of CD19 positivity in pediatric t(8;21) AML at diagnosis, and gain of CD19  
175 expression in relapsed cases with CD19<sup>-</sup> disease at initial diagnosis.

### 176 **CD19<sup>+</sup> t(8;21) AML exhibits reduced metabolic activity and cell division**

177 We next sought to further characterize differences between CD19<sup>+</sup> and CD19<sup>-</sup> t(8;21) AML.  
178 Specifically, given the typical expression of B cell-related genes such as *CD19* and *PAX5*, a B  
179 lymphoid transcription factor responsible for *CD19* upregulation, in t(8;21) AML, we aimed to  
180 investigate whether gene expression programs seen in (pre-)B cells were present in CD19<sup>+</sup> t(8;21)  
181 AML. To investigate this, we retrieved BM bulk RNA-sequencing data of patients with CD19<sup>+</sup>- and  
182 CD19<sup>-</sup> t(8;21) AML and a blast percentage of at least 75% (n=6 vs. n=3, respectively). As  
183 anticipated, differential gene expression analysis revealed significant upregulation of the B cell-  
184 related genes *CD19* and *POU2AF1* in CD19<sup>+</sup> t(8;21) AML, as well as a trend towards higher  
185 expression of *PAX5* (**Figure 2A-B** and **Supplementary Table 3**).<sup>35</sup> Furthermore, GSEA showed  
186 that CD19<sup>+</sup> t(8;21) AML demonstrated a decrease in various metabolic processes including  
187 oxidative phosphorylation and fatty acid metabolism in comparison to CD19<sup>-</sup> t(8;21) AML,  
188 suggestive of lower metabolic activity in CD19<sup>+</sup> t(8;21) AML (**Figure 2C** and **Figure S2**). These  
189 data are consistent with previous work showing that *PAX5* enforces a state of chronic energy  
190 deprivation in pre-B cells.<sup>36</sup> In addition, cell cycle-related pathways were depleted in CD19<sup>+</sup>-  
191 compared to CD19<sup>-</sup> t(8;21) AML, together suggesting a less proliferative state in CD19<sup>+</sup> t(8;21)



192 AML (**Figure 2C** and **Figure S2**). Given that such cells show in general less susceptibility to  
193 conventional chemotherapy, these data suggest that alternative therapies such as  
194 immunotherapies could be a suitable treatment option for CD19<sup>+</sup> AML.<sup>37</sup>

### 195 **CD19 is expressed among different t(8;21) AML subpopulations**

196 To evaluate the suitability of CD19 as an immunotherapeutic target, we next aimed to characterize  
197 the CD19 expression levels in CD19<sup>+</sup> t(8;21) AML. To do so, we re-analyzed diagnostic flow  
198 cytometry data available for six CD19<sup>+</sup> t(8;21) AML patients (patient #01-06) and one CD19<sup>-</sup>  
199 t(8;21) AML patient (patient #07; control), which allowed for investigating the expression of CD19  
200 on CD45<sup>dim</sup>SSC-A<sup>low</sup>CD34<sup>+</sup> cells, and compared this to BMMC-derived CD19<sup>+</sup> B- and CD19<sup>-</sup> T  
201 cells (from patient #01) as a representative positive and negative control, respectively. The cell  
202 surface expression of CD19 in two patients (patients #01 and 02) approximated the expression  
203 level seen in CD19<sup>+</sup> B cells, with a unimodal pattern (**Figure 3B**). In the remaining four CD19<sup>+</sup>  
204 patients, we observed a continuum of CD19 expression levels on AML cells, ranging from the  
205 level seen in CD19<sup>+</sup> B cells to that of T cells (range: 0 to 4 log; **Figure 3B**). Importantly, internal  
206 staining of the leukemic fusion protein RUNX1::ETO demonstrated a strong correlation with CD19  
207 positivity (patient #01 and one additional primary BMMC sample: #08; **Figure 3C** and **S3A**). Given  
208 the success of blinatumomab in the treatment of BCP-ALL, we also investigated how the CD19  
209 expression level on CD19<sup>+</sup> t(8;21) AML samples (RL048 PDX and patient #08) compared to that  
210 on two primary BCP-ALL BMMC samples. While the CD19 MFI in AML patient #08 was lower  
211 compared to both BCP-ALL samples, the MFI of the AML PDX sample was just as high (ALL  
212 patient #02) or even higher compared to the BCP-ALL samples (patient #01) (**Figure 3D**).

213 Since individual AML cells in the BM may vary in terms of maturation stages, targeting  
214 both immature and more mature AML cells is necessary for sustained therapeutic benefit.<sup>38</sup>

215 Therefore, we next sought to investigate the CD19 expression on different AML subpopulations,  
216 including CD34<sup>+</sup>CD38<sup>-</sup> cells that encompass the leukemic stem cell (LSC) compartment, as well  
217 as those with a CD34<sup>+</sup>CD38<sup>+</sup> phenotype. Performing flow cytometry on three samples (AML  
218 patients #01, #08, and RL048 PDX cells), we observed that nearly all CD34<sup>+</sup>CD38<sup>-</sup> immature  
219 progenitors were positive for CD19 (**Figure 3E** and **S3BC**). These data are in line with previous  
220 data in two adults with t(8;21) AML showing that 77 and 91% of CD34<sup>+</sup>CD38<sup>-</sup> cells were CD19<sup>+</sup>,  
221 respectively.<sup>39, 40</sup> Furthermore, using a more extended flow cytometry panel for analysis of  
222 BMNCs from patient #01, we identified CD19 to be expressed on LSCs (CD34<sup>+</sup>CD38<sup>-</sup>CD45RA<sup>+</sup>)  
223 but not on normal stem cells (CD34<sup>+</sup>CD38<sup>-</sup>CD45RA<sup>-</sup>; **Figure 3D**). Similar to immature  
224 subpopulations, virtually all CD34<sup>+</sup>CD38<sup>+</sup> blasts were positive for CD19. Moreover, we noted  
225 CD19 expression on both CD34<sup>+</sup>CD38<sup>+</sup>CD11b<sup>+</sup> and CD34<sup>+</sup>CD38<sup>+</sup>CD11b<sup>-</sup> cells, indicating CD19  
226 expression on both more and less mature AML cells (**Figure 3D** and **S3B, S3C**). Taken together,  
227 these observations highlight that, in case of high overall AML CD19 expression, both primitive  
228 and more differentiated AML cells are potential targets of CD19-directed immunotherapies in  
229 CD19<sup>+</sup> t(8;21) AML, encouraging exploration of their *ex vivo* killing efficiency.

### 230 **Blinatumomab is capable of activating T cells when bound to AML cells**

231 Given the possibility of defective immune synapse formation between AML- and T cells, impairing  
232 proper T cell activation,<sup>41</sup> we next investigated whether blinatumomab-mediated AML-T cell  
233 contact could facilitate the activation of T cells. Using genetically engineered Jurkat cells  
234 (CD3<sup>+</sup>CD4<sup>+</sup>) that express luciferase upon induction of the IL2 promoter following CD3 activation  
235 (**Figure 4A**), we observed a dose-dependent increase in the luminescent signal in a co-culture of  
236 CD19<sup>+</sup> AML PDX- and Jurkat cells (**Figure 4B**), suggesting that blinatumomab can activate CD3  
237 signaling in T cells by binding to CD19<sup>+</sup> AML cells. To further validate this finding, we co-cultured  
238 healthy donor T cells with CD19<sup>+</sup> AML PDX (RL048) cells in the presence or absence of

239 blinatumomab for 48 hours. Addition of blinatumomab to the RL048 and T cell co-culture led to  
240 significant upregulation of the T cell activation markers CD25 (50% marker positivity) and CD137  
241 (90% marker positivity), indicative of potent T cell activation (**Figure 4C**). In summary, these  
242 findings demonstrate that blinatumomab can activate T cells when bound to CD19<sup>+</sup> AML cells.  
243 Based on the T cell activation assay, we identified 1 nM as the optimal concentration of  
244 blinatumomab to activate T cells in our co-cultures. Therefore, this concentration was used in  
245 subsequent *ex vivo* co-cultures involving blinatumomab.

#### 246 **CD19<sup>+</sup> AML is sensitive to immunotherapy-mediated T cell cytotoxicity *ex vivo***

247 To determine whether AML cells were sensitive to blinatumomab-mediated T cell cytotoxicity, we  
248 co-cultured CD19<sup>+</sup> AML PDX cells with or without healthy donor T cells for 48 hours, in the  
249 absence or presence of blinatumomab. Treatment of PDX cells with 1 nM of blinatumomab  
250 induced 40% AML cell killing at a low E:T ratio of 1:10 and almost 90% killing at an E:T ratio of  
251 1:1 (**Figure 4D**). Importantly, absence of allogeneic T cells or blinatumomab led to no or negligible  
252 background killing (**Figure 4D**). We next compared the blinatumomab-mediated T cell killing  
253 efficiency between AML and BCP-ALL cells, at increasing E:T ratios of healthy donor T cells.  
254 Intriguingly, although we observed substantial variation in the killing efficiency among the three  
255 BCP-ALL samples, the observed AML cell killing was comparable to that in BCP-ALL in each E:T  
256 ratio ( $P > 0.05$ ; **Figure 4E**).

257 In addition to blinatumomab, CD19-directed CAR T cells have been approved for the  
258 treatment of both pediatric and adult BCP-ALL.<sup>13, 15</sup> Therefore, we assessed whether CD19<sup>+</sup>  
259 t(8;21) AML cells were sensitive to CAR T cell-mediated cytotoxicity. Similar to blinatumomab, co-  
260 culture of CAR T cells with primary AML cells at a low E:T ratio of 1:10, led to 40% killing of AML  
261 cells within 48 hours, while AML cells were nearly completely eradicated at an E:T ratio of 1:1

262 **(Figure 4F)**. Notably, AML cell viability remained constant in co-cultures with untransduced T  
263 cells from the same donor, indicating negligible background killing **(Figure 4F)**. Taken together,  
264 these findings demonstrate that CD19-directed immunotherapies induce efficient killing of CD19<sup>+</sup>  
265 AML cells *ex vivo*. These promising data prompted us to investigate whether the BM  
266 microenvironment of CD19<sup>+</sup> t(8;21) AML patients is supportive of CD19-directed anti-tumor  
267 immunity.

### 268 **The composition of the bone marrow immune microenvironment of t(8;21) AML is** 269 **comparable with non-leukemic controls but distinct from BCP-ALL**

270 Previous work in AML, BCP-ALL, and various other cancers has shown that the efficacy of  
271 bispecific T cell-engagers and adoptive cell therapy largely depends on the presence and function  
272 of various immune cell populations in the tumor microenvironment.<sup>8, 42-48</sup> To understand whether  
273 pediatric CD19<sup>+</sup> t(8;21) AML patients may represent a subgroup with potential to respond to  
274 CD19-directed immunotherapies, we characterized their tumor immune microenvironment using  
275 immunogenomic computational approaches applied to diagnostic BM bulk RNA-seq data **(Figure**  
276 **5A)**. Towards this end, we deconvoluted the immune cell abundance in the BM of treatment-naïve  
277 CD19<sup>+</sup> t(8;21) AML (n=5), CD19<sup>-</sup> t(8;21) AML (n=5), other AML genotypes (n=30), and non-  
278 leukemic controls (n=4) using CIBERSORTx and the TIDE algorithm.<sup>27, 30</sup> In an exploratory  
279 analysis, we did not detect differences in the estimated abundance of lymphoid subsets between  
280 CD19<sup>+</sup>- and CD19<sup>-</sup> t(8;21) AML **(Figure S4A-G)**. Likewise, no difference was observed among  
281 myeloid and stromal cell types **(Figure S4H-J)**. Therefore, we considered these cases in  
282 aggregate for subsequent comparisons (referred to as t(8;21) group; n=10). We did not detect  
283 any differences in the abundance of microenvironmental subsets between both AML groups and  
284 non-leukemic controls **(Figure 5B-E, S4K-P)**. In line with this, multiple RNA-based metrics related  
285 to immune function and -escape were similar among the three groups **(Figure 5F-I)**. Indeed, T-

286 and NK cell-related cytolytic activity (comprised of *GZMA*, *GZMH*, *GZMM*, *GNLY*, *PRF1*) (**Figure**  
287 **5F**),<sup>31</sup> a 172-gene immune effector dysfunction score (IED172) reflecting T- and NK cell  
288 exhaustion and senescence (**Figure 5H**),<sup>32</sup> and HLA I and -II expression in AML patients did not  
289 differ from non-leukemic controls (**Figure 5H-I**).<sup>31</sup> These data indicate that the BM immune  
290 microenvironment of t(8;21) AML at diagnosis does not harbor a particularly dysfunctional immune  
291 effector fraction nor is it highly immunosuppressive in comparison to non-leukemic controls,  
292 suggestive of low immune pressure in this AML subtype.

293 As CD19-directed immunotherapies have led to impressive and durable responses in  
294 pediatric BCP-ALL, we next applied our immunogenomic approach to investigate how the  
295 diagnostic BM immune microenvironment of pediatric t(8;21) AML (n=10) compared to that of  
296 pediatric BCP-ALL (n=209; **Figure 5A**). As anticipated because of the B cell origin of BCP-ALL,  
297 we detected a significant enrichment in naïve B cells in comparison to t(8;21) AML (**Figure S4K**).  
298 Furthermore, BCP-ALL cases had a significantly higher abundance of MDSCs and were enriched  
299 for T- and NK cell exhaustion and senescence, potentially reflecting a prior T- and NK cell  
300 response rendered dysfunctional (**Figure 5B and G**). On the other hand, CAFs, memory B cells,  
301 and plasma cells were significantly increased in t(8;21) AML compared to BCP-ALL, albeit  
302 absolute differences were minimal for the latter two (**Figure 5C and S4L-M**). Whereas no  
303 differences in HLA I expression were detected, HLA II expression was significantly increased in  
304 BCP-ALL compared to t(8;21) AML (**Figure 5H-I**), which is likely related to the antigen presenting  
305 cell-origin of BCP-ALL cells.<sup>31</sup> Altogether, our immunogenomic approach revealed that the BM  
306 microenvironment in pediatric t(8;21) AML is comparable to that of non-leukemic controls but, at  
307 least in part, distinct from that of pediatric BCP-ALL.

308

309 **Autologous T cells from t(8;21) AML patients are functional and induce cytotoxicity upon**  
310 **activation by blinatumomab**

311 Following the characterization of the BM immune microenvironment in t(8;21) AML patients, we  
312 sought to evaluate the efficacy of blinatumomab-mediated killing of CD19<sup>+</sup> t(8;21) AML cells by  
313 autologous T cells present within BMMC samples (n=2), and to compare this to primary BCP-ALL  
314 (n=3). Such an autologous killing assay would reveal the functionality of AML T cells compared  
315 to those present in BCP-ALL, at the naturally occurring E:T ratio and in the presence of other  
316 BMMCs, approximating the *in vivo* composition. The two AML samples contained 4% and 8%  
317 CD3<sup>+</sup> T cells, respectively, while all three BCP-ALL samples harbored nearly 3% CD3<sup>+</sup> T cells.  
318 Interestingly, addition of blinatumomab (1 nM) to 1 x 10<sup>5</sup> BMMCs led, in 48 hours, to a reduction  
319 in AML cell viability of approximately 50% compared to the viability in the absence of  
320 blinatumomab, which was comparable to that seen in the BCP-ALL samples ( $P > 0.05$ ; **Figure**  
321 **6A**). To confirm that the reduced AML cell numbers were due to blinatumomab-mediated T cell  
322 killing, we measured IFN- $\gamma$  secretion and the expression of activation markers on the autologous  
323 T cells. In both AML samples, we found that blinatumomab induced a significant increase in IFN-  
324  $\gamma$  secretion, with the extent proportional to the abundance of T cells in the BM (**Figure 6B**). In  
325 addition, the expression of the T cell activation markers CD25 and CD137 on BM T cells increased  
326 substantially in response to blinatumomab (**Figure 6C**). For patient #01, matched PB was also  
327 available, which allowed for a co-culture of PB-derived T cells and autologous BMMCs for 48  
328 hours with or without blinatumomab. Consistent with the findings with autologous BM T cells,  
329 autologous PB T cells, co-cultured with matched BMMCs, showed substantial activation upon  
330 treatment with blinatumomab (**Figure 6D**). Accordingly, PB-derived T cells demonstrated effective  
331 AML cell killing (**Figure 6E**). Furthermore, this was accompanied by substantial IFN- $\gamma$  secretion  
332 (**Figure 6F**) and increased T cell numbers after treatment (**Figure 6G**). Overall, these findings

333 demonstrate that autologous T cells from AML patients are capable to induce cytotoxicity upon  
334 binding to T cell-engagers, encouraging the exploitation of CD19 as an immunotherapy target in  
335 pediatric CD19<sup>+</sup> t(8;21) AML.

## 336 **Discussion**

337 Repurposing immunotherapies that have been approved for other hematological malignancies  
338 may not only accelerate the realization of potential clinical benefits, it can also reduce the inherent  
339 risks and delays associated with introducing novel agents. The success of CD19-directed  
340 immunotherapies in BCP-ALL, as well as in two adults with relapsed CD19<sup>+</sup> t(8;21) AML,<sup>17, 18</sup>  
341 prompted us to investigate whether CD19 could be a valuable immunotherapy target in pediatric  
342 AML. Our study reveals that a subset of pediatric AML patients, in particular those with t(8;21)  
343 AML, express CD19 at diagnosis, consistent with findings in adult AML.<sup>33</sup> Importantly, the extent  
344 of CD19 expression on AML cells among those classified as having CD19<sup>+</sup> AML was  
345 heterogeneous, indicating that not all CD19<sup>+</sup> t(8;21) AML patients may be suitable candidates for  
346 CD19-directed immunotherapy. In those with unimodal and high CD19 expression, CD19 was  
347 expressed on nearly all CD34<sup>+</sup>CD38<sup>-</sup> and CD34<sup>+</sup>CD38<sup>+</sup> subpopulations, suggesting potential  
348 elimination of these AML subpopulations through CD19-directed immunotherapies. Our *ex vivo*  
349 studies revealed that blinatumomab was able to induce AML cell killing with an efficacy  
350 comparable to that seen in BCP-ALL. Moreover, CAR T cells could effectively eliminate CD19<sup>+</sup>  
351 AML cells *ex vivo*. Lastly, T- and NK cells in the bone marrow of pediatric t(8;21) AML appeared  
352 to be less exhausted and senescent in comparison to pediatric BCP-ALL. Collectively, our study  
353 demonstrates the potential of CD19-directed immunotherapies for the treatment of pediatric  
354 CD19<sup>+</sup> AML.

355 While pediatric t(8;21) AML has a favorable prognosis following current chemotherapy  
356 regimens (5-year OS rate of nearly 90%),<sup>49</sup> alternative therapies are needed to reduce treatment-

357 related toxicity in newly diagnosed patients, and to improve outcomes in relapsed and refractory  
358 disease. The comparable *ex vivo* blinatumomab-mediated killing efficiency in CD19<sup>+</sup> t(8;21) AML  
359 and BCP-ALL suggests that the successes observed with CD19-directed immunotherapies for  
360 BCP-ALL may be seen in CD19<sup>+</sup> t(8;21) AML as well. Given that immunotherapies work best at a  
361 favorable E:T ratio, a potential setting for the use of CD19-directed immunotherapies could be  
362 that of minimal residual disease (MRD)-positivity before allo-SCT or other cellular therapies with  
363 curative intent.<sup>50</sup> Furthermore, we envision that these therapies could serve as an alternative to  
364 intensive chemotherapy in case of excess toxicity, or as a life-prolonging treatment when curative  
365 options are no longer viable. Of relevance, given the heterogeneous expression of CD19 in those  
366 classified as having CD19<sup>+</sup> AML, flow cytometry should be used to assess the fraction and  
367 intensity of AML cells positive for CD19. Moreover, data from our study and others show that a  
368 subset of patients with CD19<sup>-</sup> AML at diagnosis gained CD19-expression at relapse, highlighting  
369 another subgroup that could potentially benefit from CD19-directed immunotherapies as well.<sup>51</sup>

370 In addition to our *ex vivo* studies, our characterization of the BM immune  
371 microenvironment provides insight into the *in vivo* setting, which may further contribute to  
372 identifying patients that are likely to benefit from these immunotherapies. Interestingly, our  
373 immunogenomic analyses revealed that the BM immune microenvironment in pediatric t(8;21)  
374 AML was highly similar to that of non-leukemic controls, suggestive of low immune pressure. In  
375 addition, pediatric t(8;21) AML appeared to have a less exhausted and senescent T- and NK cell  
376 compartment in comparison to pediatric BCP-ALL. As T- and NK cell exhaustion and senescence  
377 have recently been linked to resistance to bispecific antibodies and immune checkpoint inhibitors,  
378 the more inert T- and NK cell state in t(8;21) AML could be a favorable starting point for response  
379 to CD19-directed immunotherapies.<sup>32</sup>



380 A limitation of our study is the relatively small number of CD19<sup>+</sup> AML samples available  
381 for our *ex vivo* studies. Nonetheless, the observed efficacy of CD19-directed immunotherapies  
382 was highly similar among the investigated samples, indicating robustness of our findings.

383 In conclusion, the high frequency of CD19 expression in pediatric t(8;21) AML, in  
384 combination with our *ex vivo*- and immunogenomic studies, suggests that CD19 can be exploited  
385 as an immunotherapy target in t(8;21) pediatric AML, and potentially in other AML subtypes  
386 exhibiting CD19 positivity as well. The eagerly anticipated results of three clinical trials that are  
387 investigating CD19-directed immunotherapies in R/R adult (NCT04257175 and NCT03896854)  
388 and pediatric AML (NCT02790515) will shed further light on the potential of these therapies in  
389 AML. In addition, we have initiated an international registry for pediatric AML patients treated with  
390 CD19-directed immunotherapies, which will simultaneously generate relevant knowledge  
391 regarding the efficacy and safety of these therapies in the pediatric population.

392

### 393 **Acknowledgements**

394 We would like to express our gratitude to all patients and their parents/caregivers for their  
395 participation in the research. We are grateful to Anja de Jong (Princess Máxima Center) for  
396 acquiring flow cytometry data; Zinia Kwidama for providing AML samples (UMC Amsterdam,  
397 location VUmc, The Netherlands), and Tom Reuvekamp and Marisa Westers for fruitful  
398 discussions of the data. Feeders for rapid T-cell expansion were kindly provided by dr. Zsolt  
399 Sebestyen (UMC Utrecht, The Netherlands). Figures were created with BioRender.com.

400

401

402

403 **Author contributions**

404 F.B., N.W., G.K., and O.H. formulated the study concept and designed experiments. The  
405 experiments were performed by F.B., J.B.K., N.W., T.M., M.A., and E.D. CAR T cell generation  
406 was performed by N.D., and A.M.C. The AML medium was optimized by A.K.H. Data  
407 interpretation was performed by F.B., N.W., and J.B.K. Co-supervising the panel design for  
408 identification of leukemic cells in killing assays of primary AML samples was done by J.C. CAR T  
409 cell production was supervised by S.N. and J.K. The manuscript was written by F.B, J.B.K., N.W.,  
410 and O.H. together with T.M. The study was supervised by K.K., C.Z., G.K., and O.H. All authors  
411 read and approved the final version of the manuscript.

412

413 **Data availability**

414 Sequencing data can be accessed from the Gene Expression Omnibus (GSEXXX; normalized  
415 counts [GSE IDs will be available upon publication]. Raw sequencing data requests should be  
416 addressed to and will be fulfilled by the corresponding author.

417

418

419

420

## 421 References

- 422 1. Zwaan CM, Kolb EA, Reinhardt D, et al. Collaborative efforts driving progress in pediatric acute  
423 myeloid leukemia. *Journal of clinical oncology* 2015;33:2949.
- 424 2. Hoffman AE, Schoonmade LJ, Kaspers GJ. Pediatric relapsed acute myeloid leukemia: a  
425 systematic review. *Expert Review of Anticancer Therapy* 2021;21:45-52.
- 426 3. Rubnitz JE, Kaspers GJ. How I treat pediatric acute myeloid leukemia. *Blood* 2021;138:1009-  
427 1018.
- 428 4. Lynch TJ, Bondarenko I, Luft A, et al. Ipilimumab in combination with paclitaxel and carboplatin  
429 as first-line treatment in stage IIIB/IV non-small-cell lung cancer: results from a randomized,  
430 double-blind, multicenter phase II study. *Journal of clinical oncology* 2012;30:2046-2054.
- 431 5. Kantarjian H, Stein A, Gökbuget N, et al. Blinatumomab versus chemotherapy for advanced  
432 acute lymphoblastic leukemia. *New England Journal of Medicine* 2017;376:836-847.
- 433 6. von Stackelberg A, Locatelli F, Zugmaier G, et al. Phase I/phase II study of blinatumomab in  
434 pediatric patients with relapsed/refractory acute lymphoblastic leukemia. *Journal of Clinical  
435 Oncology* 2016;34:4381-4389.
- 436 7. Daver N, Alotaibi AS, Bücklein V, et al. T-cell-based immunotherapy of acute myeloid leukemia:  
437 Current concepts and future developments. *Leukemia* 2021;35:1843-1863.
- 438 8. Vadakekolathu J, Rutella S. Escape from T-cell targeting immunotherapies in acute myeloid  
439 leukemia. *Blood* 2023.
- 440 9. Wijnen NE, Koedijk JB, Klein K, et al. Treating CD33-Positive de novo Acute Myeloid Leukemia in  
441 Pediatric Patients: Focus on the Clinical Value of Gemtuzumab Ozogamicin. *OncoTargets and  
442 Therapy* 2023:297-308.
- 443 10. Koedijk JB, van der Werf I, Calkoen FG, et al. Paving the way for immunotherapy in pediatric  
444 acute myeloid leukemia: Current knowledge and the way forward. *Cancers* 2021;13:4364.
- 445 11. Queudeville M, Ebinger M. Blinatumomab in Pediatric Acute Lymphoblastic Leukemia—From  
446 Salvage to First Line Therapy (A Systematic Review). *Journal of Clinical Medicine* 2021;10:2544.
- 447 12. Cappell KM, Kochenderfer JN. Long-term outcomes following CAR T cell therapy: What we know  
448 so far. *Nature Reviews Clinical Oncology* 2023:1-13.
- 449 13. Maude SL, Laetsch TW, Buechner J, et al. Tisagenlecleucel in children and young adults with B-  
450 cell lymphoblastic leukemia. *New England Journal of Medicine* 2018;378:439-448.
- 451 14. Park JH, Rivière I, Gonen M, et al. Long-term follow-up of CD19 CAR therapy in acute  
452 lymphoblastic leukemia. *New England Journal of Medicine* 2018;378:449-459.
- 453 15. Davila ML, Riviere I, Wang X, et al. Efficacy and toxicity management of 19-28z CAR T cell  
454 therapy in B cell acute lymphoblastic leukemia. *Science translational medicine* 2014;6:224ra25-  
455 224ra25.
- 456 16. Creutzig U, van Den Heuvel-Eibrink MM, Gibson B, et al. Diagnosis and management of acute  
457 myeloid leukemia in children and adolescents: recommendations from an international expert  
458 panel. *Blood, The Journal of the American Society of Hematology* 2012;120:3187-3205.
- 459 17. Plesa A, Labussière-Wallet H, Hayette S, et al. Efficiency of blinatumomab in at (8; 21) acute  
460 myeloid leukemia expressing CD19. *Haematologica* 2019;104:e487-e488.
- 461 18. Danylesko I, Jacoby E, Yerushalmi R, et al. Remission of acute myeloid leukemia with t (8; 21)  
462 following CD19 CAR T-cells. *Leukemia* 2020;34:1939-1942.
- 463 19. Dutch Foundation for Quality Assessment in Medical Laboratories  
464 Volume 2023.

- 465 20. Kellaway SG, Potluri S, Keane P, et al. Leukemic stem cells activate lineage inappropriate  
466 signalling pathways to promote their growth. *Nat Commun* 2024;15:1359.
- 467 21. Marcu-Malina V, Heijhuurs S, van Buuren M, et al. Redirecting  $\alpha\beta$  T cells against cancer cells by  
468 transfer of a broadly tumor-reactive  $\gamma\delta$ T-cell receptor. *Blood* 2011;118:50-9.
- 469 22. van Belzen IA, Cai C, van Tuil M, et al. Systematic discovery of gene fusions in pediatric cancer by  
470 integrating RNA-seq and WGS. *BMC cancer* 2023;23:618.
- 471 23. Hehir-Kwa JY, Koudijs MJ, Verwiel ET, et al. Improved gene fusion detection in childhood cancer  
472 diagnostics using RNA sequencing. *JCO precision oncology* 2022;6:e2000504.
- 473 24. Graves-Lindsay T, Albracht D, Fulton RS, et al. Evaluation of GRCh38 and de novo haploid  
474 genome assemblies demonstrates the enduring quality of the reference assembly. 2017.
- 475 25. Frankish A, Carbonell-Sala S, Diekhans M, et al. GENCODE: reference annotation for the human  
476 and mouse genomes in 2023. *Nucleic acids research* 2023;51:D942-D949.
- 477 26. Koedijk JB, van Beek TB, Vermeulen MA, et al. Case Report: Immune dysregulation associated  
478 with long-lasting regression of a (pre) leukemic clone. *Frontiers in Immunology* 2023;14.
- 479 27. Newman AM, Steen CB, Liu CL, et al. Determining cell type abundance and expression from bulk  
480 tissues with digital cytometry. *Nature biotechnology* 2019;37:773-782.
- 481 28. Wang Y, Cai Y-y, Herold T, et al. An immune risk score predicts survival of patients with acute  
482 myeloid leukemia receiving chemotherapy. *Clinical Cancer Research* 2021;27:255-266.
- 483 29. Penter L, Liu Y, Wolff JO, et al. Mechanisms of response and resistance to combined decitabine  
484 and ipilimumab for advanced myeloid disease. *Blood, The Journal of the American Society of*  
485 *Hematology* 2023;141:1817-1830.
- 486 30. Jiang P, Gu S, Pan D, et al. Signatures of T cell dysfunction and exclusion predict cancer  
487 immunotherapy response. *Nature medicine* 2018;24:1550-1558.
- 488 31. Dufva O, Pölonen P, Brück O, et al. Immunogenomic landscape of hematological malignancies.  
489 *Cancer Cell* 2020;38:380-399. e13.
- 490 32. Rutella S, Vadakekolathu J, Mazziotta F, et al. Immune dysfunction signatures predict outcomes  
491 and define checkpoint blockade-unresponsive microenvironments in acute myeloid leukemia.  
492 *The Journal of Clinical Investigation* 2022;132.
- 493 33. Kita K, Nakase K, Miwa H, et al. Phenotypical characteristics of acute myelocytic leukemia  
494 associated with the t (8; 21)(q22; q22) chromosomal abnormality: frequent expression of  
495 immature B-cell antigen CD19 together with stem cell antigen CD34. *Blood* 1992.
- 496 34. Tiacci E, Pileri S, Orleth A, et al. PAX5 expression in acute leukemias: higher B-lineage specificity  
497 than CD79a and selective association with t (8; 21)-acute myelogenous leukemia. *Cancer*  
498 *research* 2004;64:7399-7404.
- 499 35. Ray D, Kwon SY, Tagoh H, et al. Lineage-inappropriate PAX5 expression in t(8;21) acute myeloid  
500 leukemia requires signaling-mediated abrogation of polycomb repression. *Blood* 2013;122:759-  
501 69.
- 502 36. Chan LN, Chen Z, Braas D, et al. Metabolic gatekeeper function of B-lymphoid transcription  
503 factors. *Nature* 2017;542:479-483.
- 504 37. Dick JE. Stem cell concepts renew cancer research. *Blood* 2008;112:4793-4807.
- 505 38. McKenzie MD, Ghisi M, Oxley EP, et al. Interconversion between Tumorigenic and Differentiated  
506 States in Acute Myeloid Leukemia. *Cell Stem Cell* 2019;25:258-272.e9.
- 507 39. Terwijn M, Zeijlemaker W, Kelder A, et al. Leukemic stem cell frequency: a strong biomarker for  
508 clinical outcome in acute myeloid leukemia. *PloS one* 2014;9:e107587.

- 509 40. Van Rhenen A, Moshaver B, Kelder A, et al. Aberrant marker expression patterns on the CD34+  
510 CD38- stem cell compartment in acute myeloid leukemia allows to distinguish the malignant  
511 from the normal stem cell compartment both at diagnosis and in remission. *Leukemia*  
512 2007;21:1700-1707.
- 513 41. Le Dieu R, Taussig DC, Ramsay AG, et al. Peripheral blood T cells in acute myeloid leukemia  
514 (AML) patients at diagnosis have abnormal phenotype and genotype and form defective  
515 immune synapses with AML blasts. *Blood, The Journal of the American Society of Hematology*  
516 2009;114:3909-3916.
- 517 42. Zhao Y, Aldoss I, Qu C, et al. Tumor-intrinsic and-extrinsic determinants of response to  
518 blinatumomab in adults with B-ALL. *Blood, The Journal of the American Society of Hematology*  
519 2021;137:471-484.
- 520 43. Feucht J, Kayser S, Gorodezki D, et al. T-cell responses against CD19+ pediatric acute  
521 lymphoblastic leukemia mediated by bispecific T-cell engager (BiTE) are regulated contrarily by  
522 PD-L1 and CD80/CD86 on leukemic blasts. *Oncotarget* 2016;7:76902.
- 523 44. Duell J, Dittrich M, Bedke T, et al. Frequency of regulatory T cells determines the outcome of the  
524 T-cell-engaging antibody blinatumomab in patients with B-precursor ALL. *Leukemia*  
525 2017;31:2181-2190.
- 526 45. Uy GL, Aldoss I, Foster MC, et al. Flotetuzumab as salvage immunotherapy for refractory acute  
527 myeloid leukemia. *Blood, The Journal of the American Society of Hematology* 2021;137:751-762.
- 528 46. Friedrich MJ, Neri P, Kehl N, et al. The pre-existing T cell landscape determines the response to  
529 bispecific T cell engagers in multiple myeloma patients. *Cancer Cell* 2023;41:711-725. e6.
- 530 47. Bagaev A, Kotlov N, Nomie K, et al. Conserved pan-cancer microenvironment subtypes predict  
531 response to immunotherapy. *Cancer cell* 2021;39:845-865. e7.
- 532 48. Koedijk JB, van der Werf I, Penter L, et al. A multidimensional analysis reveals distinct immune  
533 phenotypes and tertiary lymphoid structure-like aggregates in the bone marrow of pediatric  
534 acute myeloid leukemia. *medRxiv* 2023:2023.03. 03.23286485.
- 535 49. Reedijk A, Klein K, Coebergh J, et al. Improved survival for children and young adolescents with  
536 acute myeloid leukemia: a Dutch study on incidence, survival and mortality. *Leukemia*  
537 2019;33:1349-1359.
- 538 50. Subklewe M, Bücklein V, Sallman D, et al. Novel immunotherapies in the treatment of AML: is  
539 there hope? *Hematology* 2023;2023:691-701.
- 540 51. Lambo S, Trinh DL, Ries RE, et al. A longitudinal single-cell atlas of treatment response in  
541 pediatric AML. *Cancer Cell* 2023;41:2117-2135. e12.

542

543

544 **Table 1.** Baseline characteristics of CD19<sup>+</sup> pediatric AML patients at diagnosis.

| <b>Characteristics</b>          |          | <b>CD19<sup>+</sup> AML</b>    |
|---------------------------------|----------|--------------------------------|
|                                 | <b>N</b> | <b>n (%) or median (range)</b> |
| Age at diagnosis (years)        | 18       | 10.5 (1-17)                    |
| Sex                             | 18       |                                |
| Male                            |          | 14 (78)                        |
| Female                          |          | 4 (22)                         |
| Hemoglobin (g/dL)               | 14       | 5.1 (3.6-7.3)                  |
| WBC (x10 <sup>9</sup> /L)       | 14       | 11.2 (0.9-70)                  |
| Platelets (x10 <sup>9</sup> /L) | 14       | 47.5 (22-343)                  |
| Percentage leukemic cells       |          |                                |
| Bone marrow                     | 15       | 54.0 (9-94)                    |
| Peripheral blood                | 9        | 55.0 (12-80)                   |

545

546

547 **Figure legends**

548 **Figure 1. CD19 expression among pediatric AML patients.**

549 (A) Incidence of CD19 positivity among newly diagnosed and relapsed pediatric AML patients.  
550 (B) Cytogenetic alterations observed in CD19<sup>+</sup> pediatric AML patients. NA=not available. (C)  
551 Incidence of the t(8;21) subtype across the total cohort, and the incidence of CD19 positivity  
552 among all t(8;21) patients.

553 **Figure 2. Transcriptomic differences between CD19<sup>+</sup> and CD19<sup>-</sup> t(8;21) AML.**

554 (A) Heatmap showing the expression of the top up- and downregulated genes between CD19<sup>+</sup>-  
555 (n=6) and CD19<sup>-</sup> (n=3) t(8;21) AML for each patient. The color bar indicates the logarithmically  
556 scaled and normalized gene expression values. (B) Volcano plot showing the differentially  
557 expressed genes between CD19<sup>+</sup>- (n=6) and CD19<sup>-</sup> t(8;21) AML. (C) Gene set enrichment  
558 analysis plot showing enriched and depleted phenotypes and pathways in CD19<sup>+</sup>- compared to  
559 CD19<sup>-</sup> t(8;21) AML. FDR <0.05 was considered significant. NES: normalized enrichment score.  
560 FDR: false discovery rate.

561 **Figure 3. Overall and subpopulation-specific CD19 expression in CD19<sup>+</sup> t(8;21) AML.**

562 (A) The gating strategy applied to myeloid blasts to identify CD19 positive populations. (B)  
563 Overview of the overall CD19 expression among CD45<sup>dim</sup>SSC-A<sup>low</sup>CD34<sup>+</sup> blasts in the bone  
564 marrow. Data were retrieved from available diagnostic files of six CD19<sup>+</sup> t(8;21) AML patients  
565 (patient #01-06) and one CD19<sup>-</sup> t(8;21) AML patient (patient #07; reference) and were compared  
566 to the CD19 expression on T cells (as CD19<sup>-</sup> control) and B cells (as CD19<sup>+</sup> control). (C) Co-  
567 expression of CD19 and RUNX1::ETO among the myeloid blasts present in the bone marrow  
568 from patient #01. (D) Comparison of CD19 expression between AML PDX (RL048), one primary  
569 sample (patient #08), and two primary BCP-ALL samples.  $\Delta$ MFI is calculated by subtracting the  
570 MFI of CD19 in stained samples from the corresponding unstained samples. (E) CD19 expression  
571 among leukemic stem cells (CD34<sup>+</sup>CD38<sup>-</sup>CD45RA<sup>+</sup>) and more mature subpopulations  
572 (CD34<sup>+</sup>CD38<sup>+</sup>CD11b<sup>+</sup>) phenotypes in patient #01. LSC: leukemic stem cell; PDX: patient-derived  
573 xenograft.

574 **Figure 4. T cell activation and/or AML cell cytotoxicity mediated by blinatumomab and CAR**  
575 **T cells.**

576 (A) Illustration of the T cell activation bioassay. (B) The luminescent signal intensity upon addition  
577 of blinatumomab to CD19<sup>+</sup> AML PDX and Jurkat cells (n=2 technical replicates). (C) Expression  
578 of the T cell activation markers upon addition of blinatumomab and/or PDX cells compared to  
579 healthy donor T cells alone. (D) Effect of 1 nM blinatumomab on the viability of PDX cells at  
580 various effector-to-target (E:T) ratios using healthy donor T cells after 48 hours. Data points  
581 represent technical replicates. (E) Comparison of blinatumomab-induced cytotoxicity in AML (n=2:  
582 patient #08 and PDX) and BCP-ALL patient samples (n=3), after 48 hours. Data represent mean  
583  $\pm$ SD. *t*-test was performed between each E:T ratio in AML versus BCP-ALL. (F) The viability of  
584 primary AML cells (patient #08) after 48 hours of co-culture with CAR T cells or untransduced T  
585 cells (control) at different E:T ratios. Data points represent technical replicates. J: Jurkat cells; P:  
586 PDX (patient-derived xenograft) cells; bead: CD3/CD28 Dynabeads; B or blin: Blinatumomab. E:  
587 effector (T cells); T: target (AML).

588

589 **Figure 5. Characterization of the bone marrow immune microenvironment of t(8;21) AML**  
590 **using immunogenomic analyses.**

591 (A) Cohort overview for the characterization of the bone marrow (BM) immune microenvironment  
592 in pediatric AML, pediatric BCP-ALL, and non-leukemic controls. The non-leukemic controls are  
593 four pediatric patients with early-stage rhabdomyosarcoma without malignant BM infiltration  
594 (methods). (B-I) Comparison of the abundance of various cell populations and gene signatures  
595 among t(8;21) AML patients, AML patients with other cytogenetic alterations, BCP-ALL patients,  
596 and non-leukemic controls. Data are presented as median with quartiles and range. The statistical  
597 tests used include the Kruskal-Wallis test with Dunn's post-hoc test for multiple comparisons. In  
598 case two *P* values are shown, the upper one indicates the result of the Kruskal-Wallis test, while  
599 the lower *P* values indicate the result of Dunn's test. MDSC: myeloid-derived suppressor cell;  
600 CAF: cancer-associated fibroblast; NK: natural killer; IED172: 172-gene immune effector  
601 dysfunction score; HLA: human leukocyte antigen.

602 **Figure 6. T cells from bone marrow and peripheral blood of t(8;21) patients are functional**  
603 **and actively induce cytotoxicity upon blinatumomab administration**

604 (A) Cytotoxicity of autologous bone marrow (BM)-derived T cells upon addition of 1 nM  
605 blinatumomab to BM mononuclear cells (MCs) from AML (n=2) and BCP-ALL (n=3) samples after  
606 48 hours. *t*-test was performed to compare results for blinatumomab-treated AML and BCP-ALL



607 samples (B) Relative interferon (IFN)- $\gamma$  measurement in the supernatant of two BMMC AML  
 608 samples; positive control: 125 pg/mL recombinant IFN- $\gamma$  protein, n= 3 technical replicates. (C-D)  
 609 Changes of the activation markers on CD3<sup>+</sup> T cells present in the BMMC sample (patient #08) (C)  
 610 or derived from peripheral blood (patient #01) (D). (E) Cytotoxicity of autologous peripheral blood-  
 611 derived CD3<sup>+</sup> T cells upon co-culture with matched BMBCs from patient #01 after 48 hours; n=3  
 612 technical replicates. (F) Relative IFN- $\gamma$  measurement in the supernatant of BMBCs from patient  
 613 #01 upon co-culture with matched BMBC cells at different E:T ratios. The + and ++ in the table  
 614 beneath show the ratio of T cells to AML cells, respectively. Absorbance values were normalized  
 615 to the corresponding value with CD3<sup>+</sup> T cells alone; positive control: 125 pg/ml recombinant IFN-  
 616  $\gamma$ , n= 3 technical replicates. CTRL: control. (G) Changes in the number of peripheral blood-derived  
 617 CD3<sup>+</sup> T cell numbers in the presence or absence of 1 nM blinatumomab and in co-culture with  
 618 BMBCs from patient #01 after 48 hours. Cell numbers for each condition (varying E:T ratios) were  
 619 normalized to the corresponding condition without blinatumomab.  
 620  
 621  
 622

Figure 1

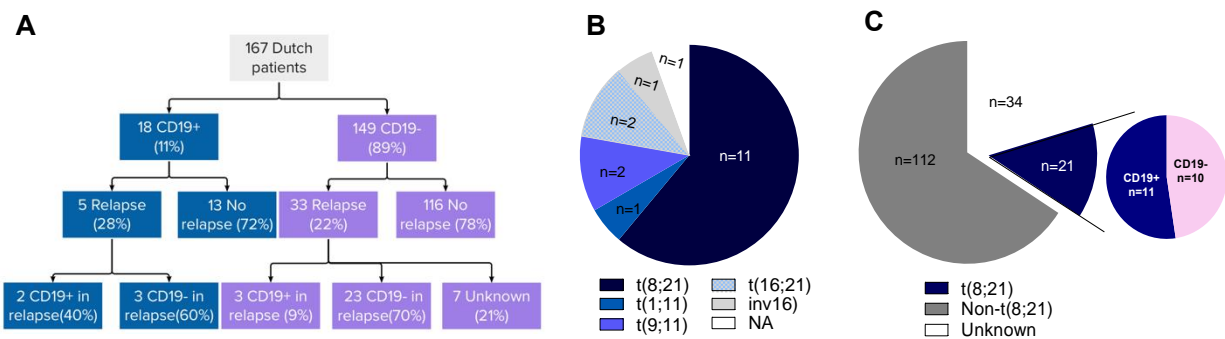

623  
 624  
 625

## Figure 2

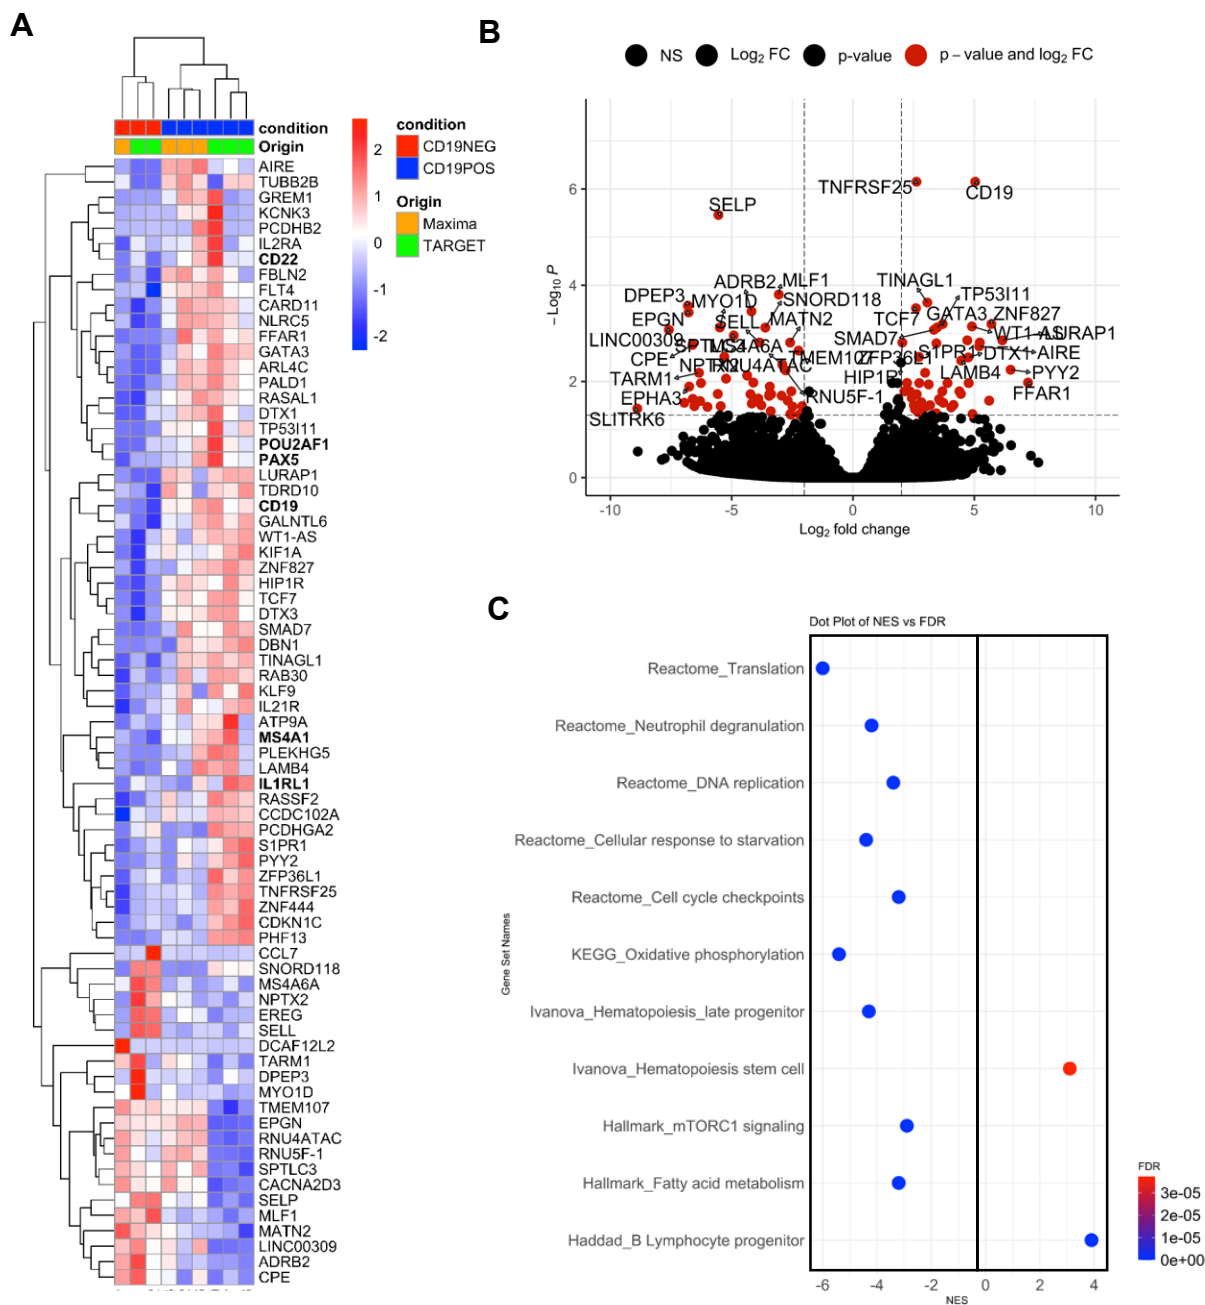

626

627

Figure 3

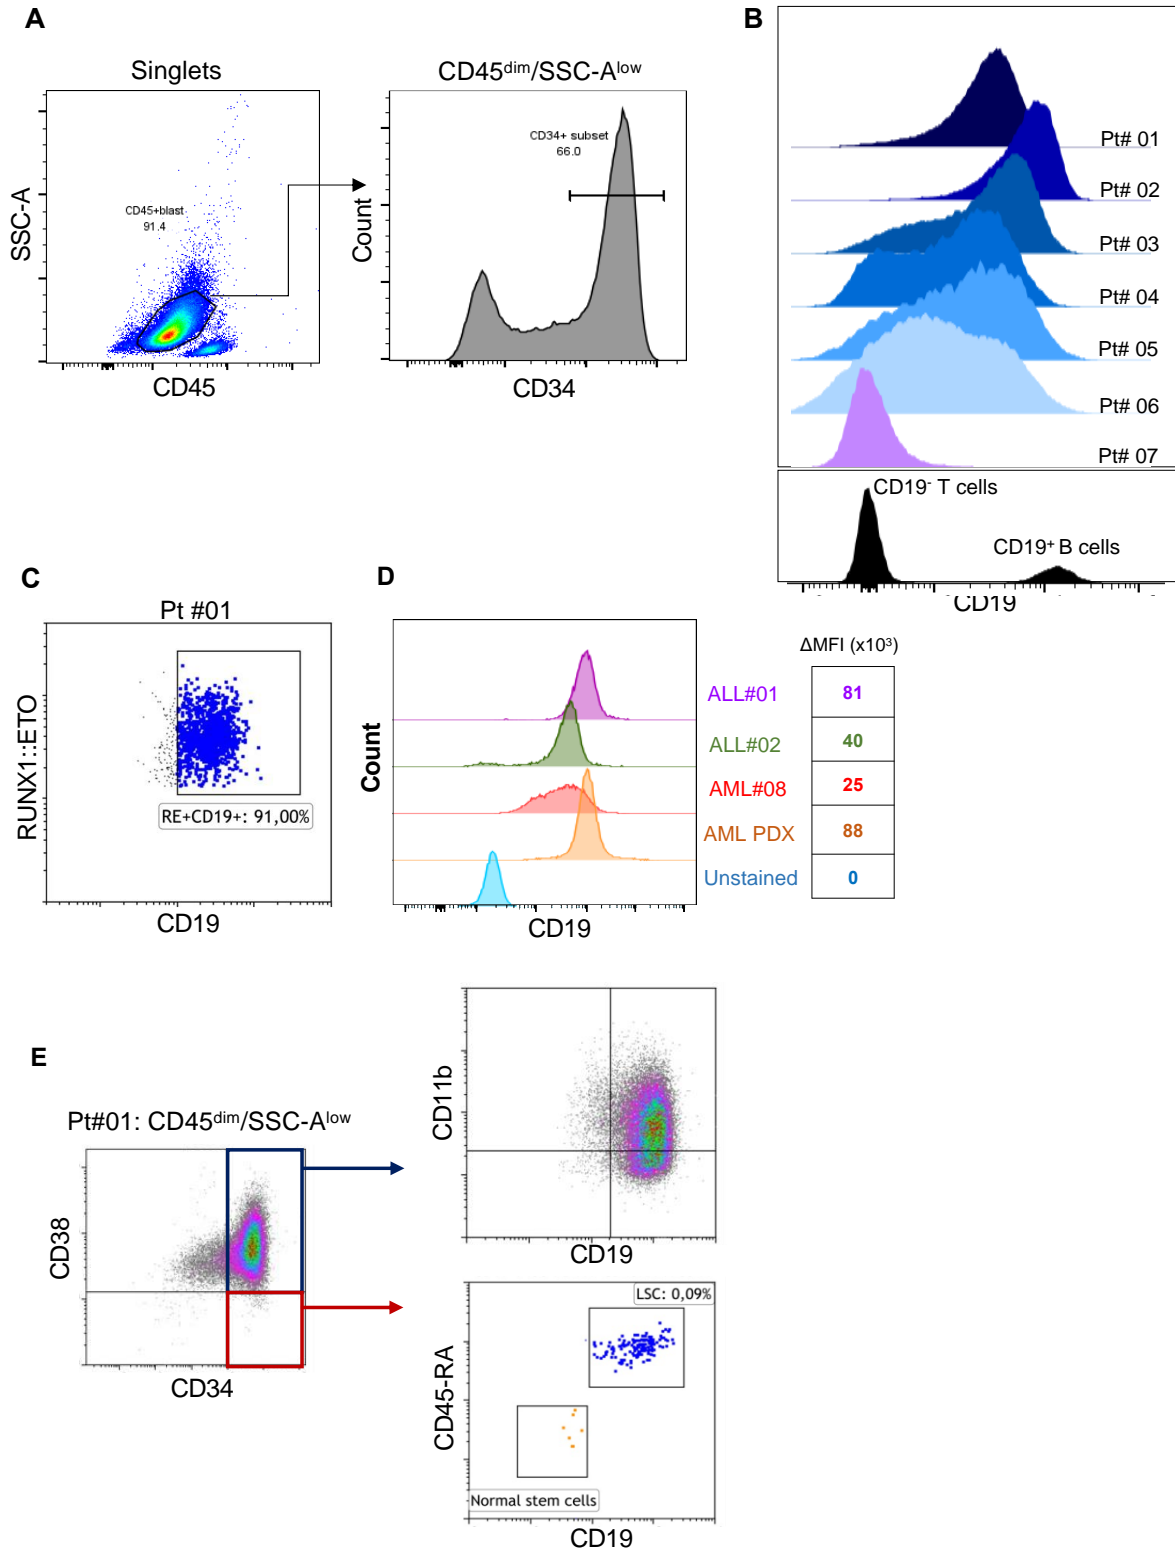

Figure 4

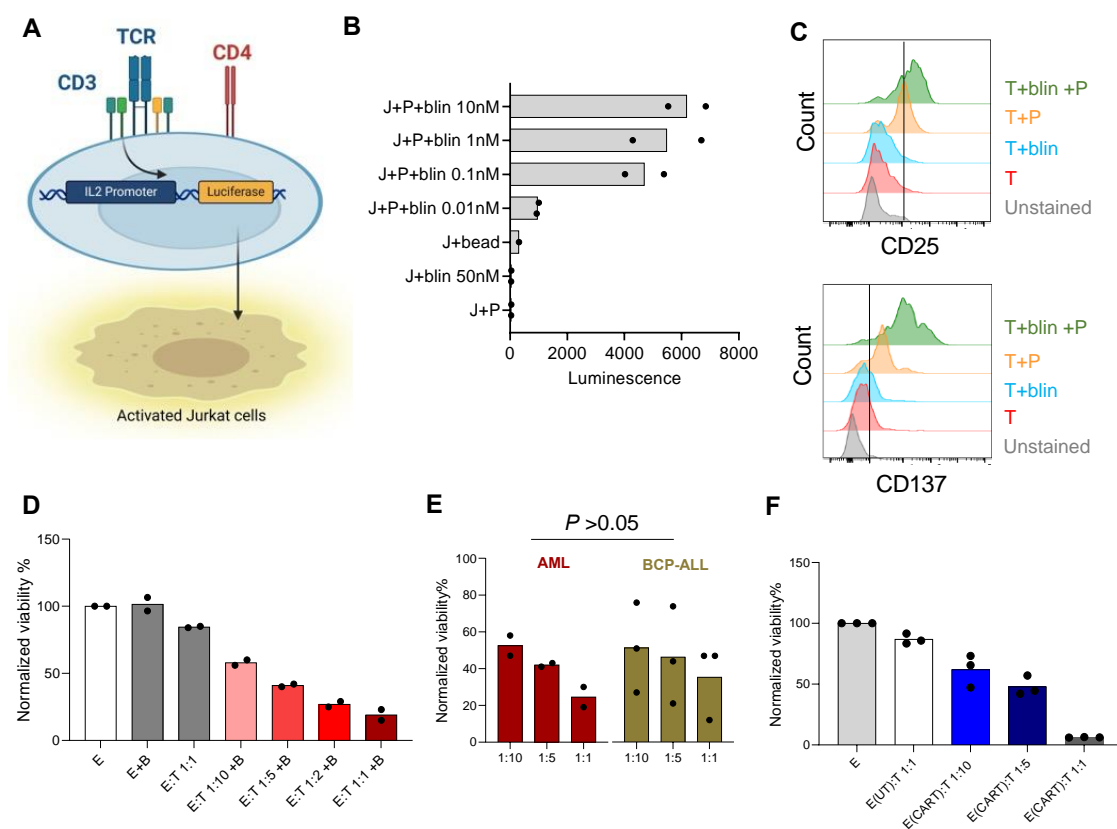

629

## Figure 5

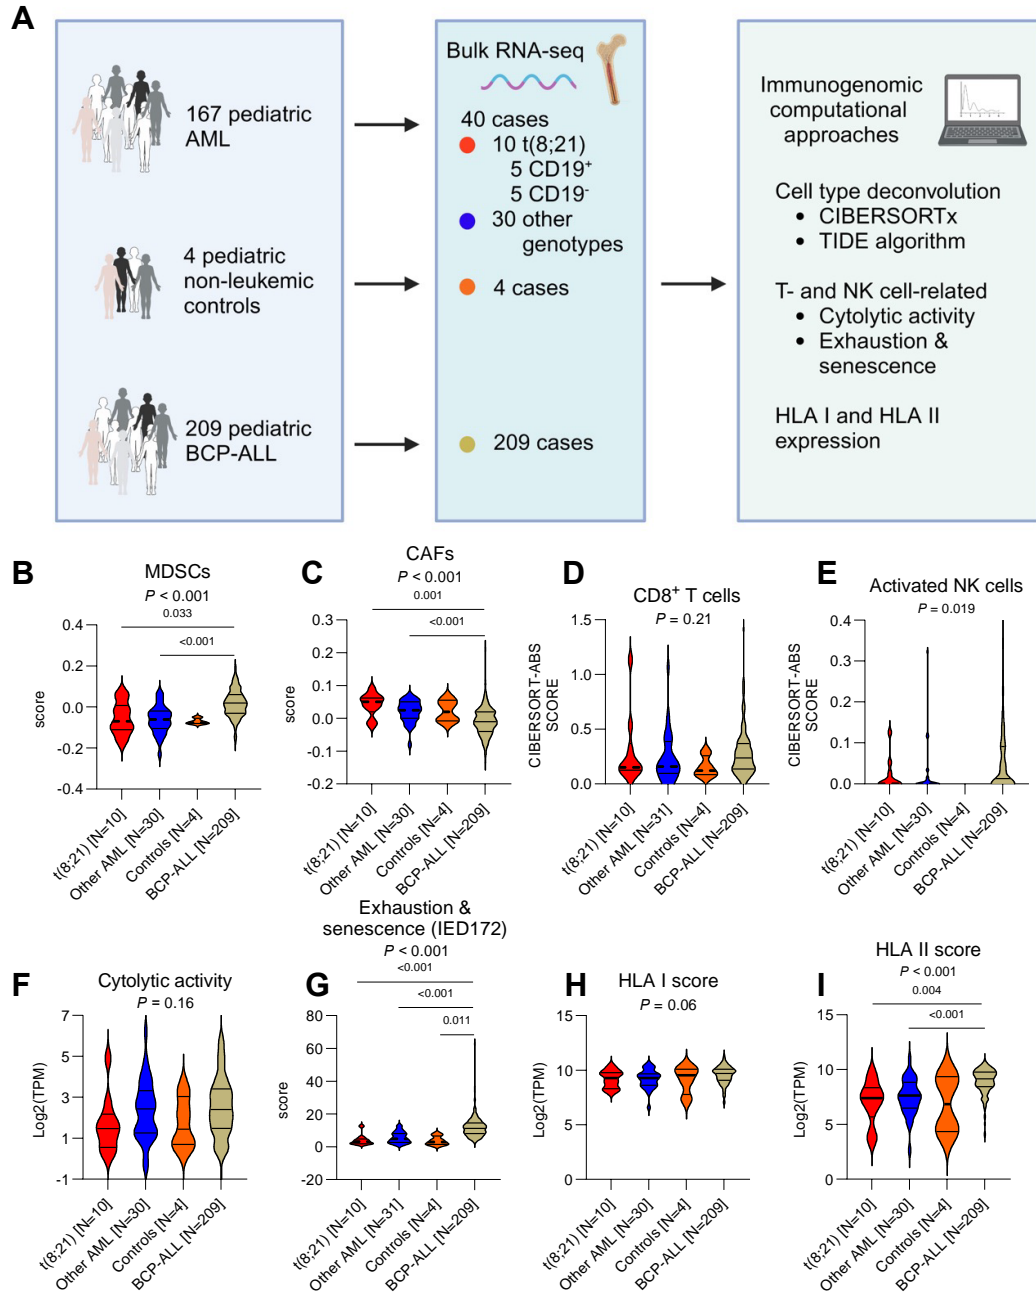

630

631

Figure 6

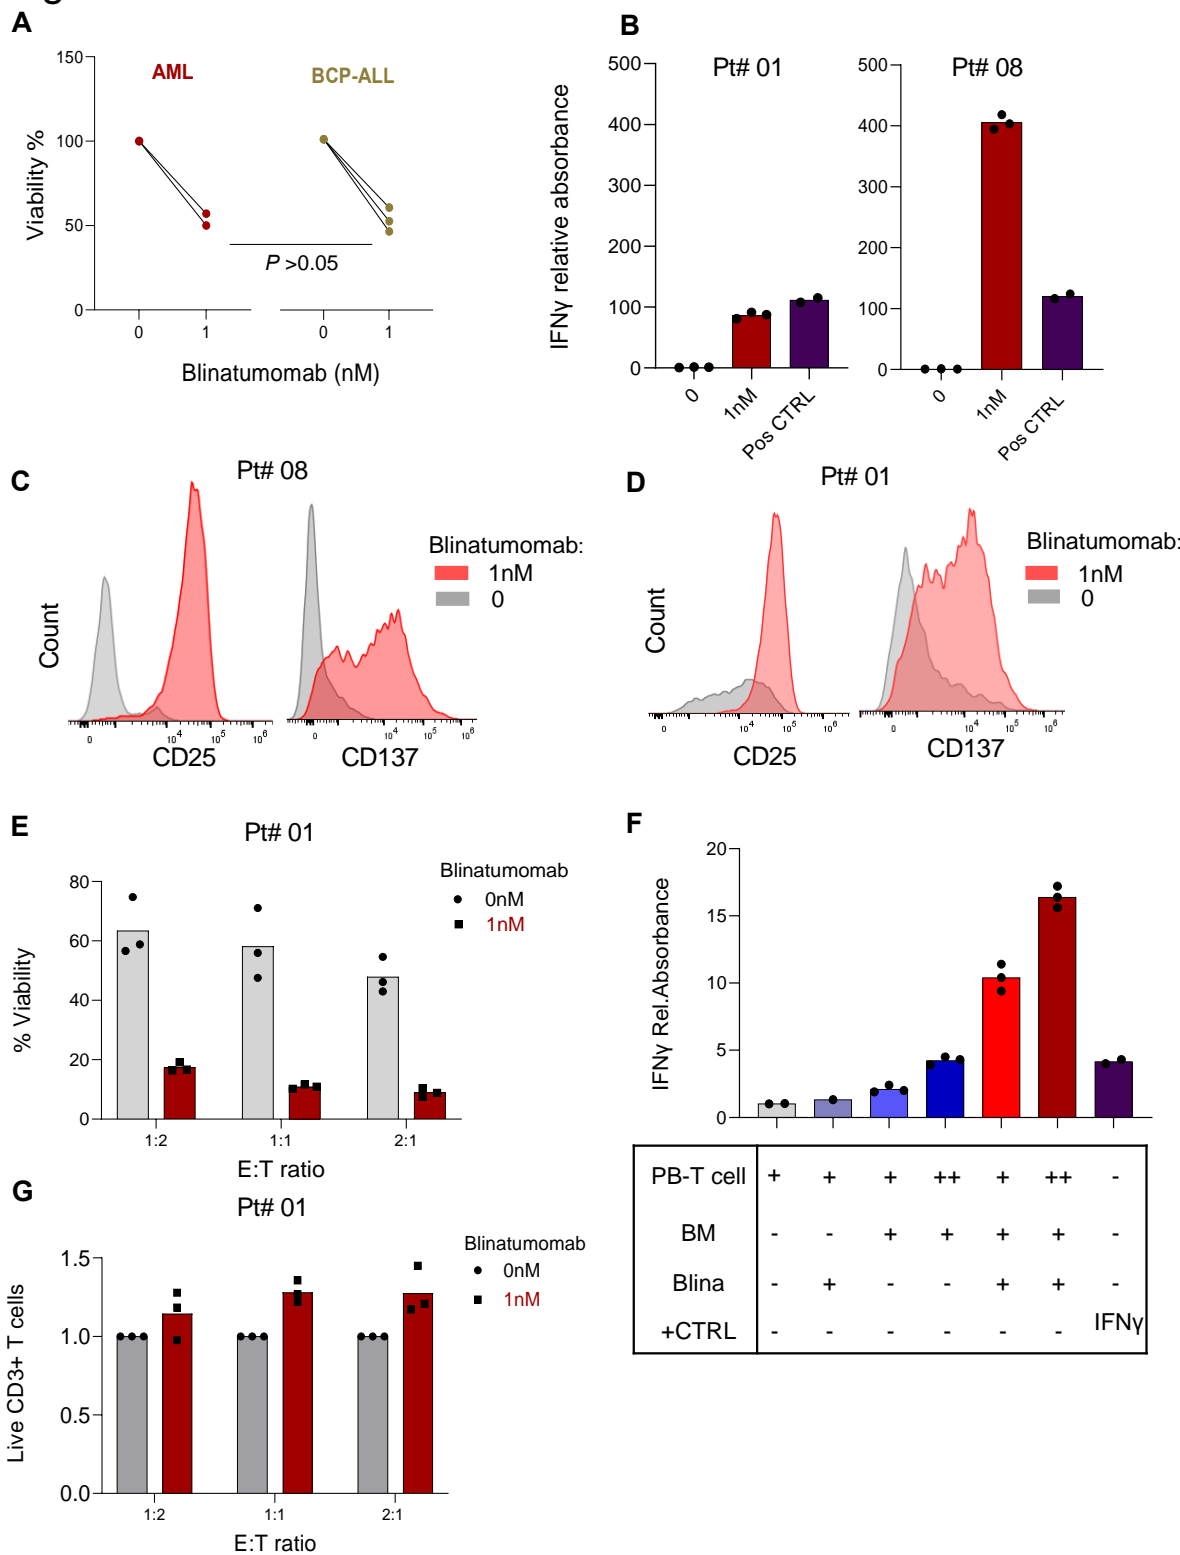

Source: https://www.biorxiv.org/content/biorxiv/early/2024/04/22/2024.04.19.590200.full.pdf
